# Supplementary material for: Engineered MED12 mutations drive leiomyoma-like transcriptional and metabolic programs by altering the 3D genome compartmentalization
Source: PubMed Central journal article supplement (PMC10333368; doi:10.1038/s41467-023-39684-y), 2023-07-10
Supplement: 41467_2023_39684_MOESM7_ESM.pdf [file 41467_2023_39684_MOESM7_ESM.pdf]

**Title: Supplementary Data 1**

**Description:** Mass-spectrometry quantified metabolite levels in WT and MED12 G44N mutant cells.

**Title: Supplementary Data 2**

**Description:** Differentially expressed genes in MED12 Gly44N colonies vs WT (DESEQ, padj<0.05) (This table has been made by DESEQ2 Package)

**Title: Supplementary Data 3**

**Description:** Differentially expressed genes in Supplementary Figure 5 (Z score)

**Title: Supplementary Data 4**

**Description:** PCR Primers and Oligos
